- patients undergoing cardiovascular surgery, *Amer. J. Surg.* 116: 686, 1968.
52. Kennedy, J. A., and Bakst, H.: The influence of emotions on the outcome of cardiac surgery: A predictive study, *Bull. N. Y. Acad. Med.* 42: 811, 1966.
  53. Kents, A. S.: The estimate of anesthetic risk in medical evaluations, *Amer. J. Cardiol.* 12: 330, 1963.
  54. Vandam, L. D.: Environmental factors in anesthesia, *Arch. Environ. Health (Chicago)* 7: 391, 1963.
  55. Moses, L. E., and Mosteller, F.: Institutional differences in postoperative death rates, *J.A.M.A.* 203: 492, 1968.
  56. Lewis, C. E.: Variations in the incidence of surgery, *New Eng. J. Med.* 281: 890, 1969.
  57. Bunker, J. P.: Surgical manpower. A comparison of operations and surgeons in the United States and in England and Wales, *New Eng. J. Med.* 282: 135, 1970.
  58. Jones, R. E., Linde, H. W., Deutsch, S., Dripps, R. D., and Price, H. L.: Hemodynamic actions of diethyl ether in normal man, *ANESTHESIOLOGY* 23: 299, 1962.
  59. Jones, R. E., Guldmann, N., Linde, H. W., Dripps, R. D., and Price, H. L.: Cyclopropane anesthesia. III. Effects of cyclopropane on respiration and circulation in normal man, *ANESTHESIOLOGY* 21: 380, 1960.
  60. Vandam, L. D.: The unfavorable effects of prolonged anaesthesia, *Canad. Anaesth. Soc. J.* 12: 107, 1965.
  61. Hotchkiss, W. S.: Patent ductus arteriosus and the occasional cardiac surgeon, *J.A.M.A.* 173: 244, 1960.
  62. Eisenman, B., and Spencer, F. C.: The occasional open-heart surgeon, *Circulation* 31: 161, 1965.
  63. Fulton, M., Julian, D. G., and Oliver, M. F.: Sudden death and myocardial infarction, *Circulation* 39 and 40: Suppl. IV: 182, 1969.
  64. Baroldi, G.: Lack of correlation between coronary thrombosis and myocardial infarction or sudden "coronary" heart death, *Ann. N. Y. Acad. Sci.* 156: 506, 1969.
  65. Stinson, E. B., Dong, E., Jr., Schroeder, J. S., and Shumway, N. E.: Cardiac transplantation in man. IV. Early results, *Ann. Surg.* 170: 558, 1969.
  66. Warren, J. E.: Myocardial infarction in an industrial population, *Arch. Environ. Health (Chicago)* 7: 210, 1963.
  67. Stein, M., Koota, C. M., Simon, M., and Frank, H. A.: Pulmonary evaluation of surgical patients, *J.A.M.A.* 181: 765, 1962.
  68. Gerson, G.: Preoperative respiratory function tests and postoperative mortality, *Brit. J. Anaesth.* 41: 967, 1969.
  69. Burrows, B., and Earle, R. H.: Prediction of survival in patients with chronic airway obstruction, *Amer. Rev. Resp. Dis.* 99: 865, 1969.
  70. Dinnick, O. P.: Deaths associated with anaesthesia, *Anaesthesia* 19: 536, 1964.

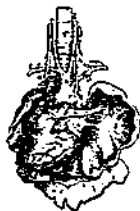

### Drugs

**COFFEE HABITUATION** Caffeine and a placebo were given in a blind study to 18 housewives who were not coffee drinkers and to 33 who were habituated to coffee. Criteria of caffeine effects were evaluated on a self-rating form. There were major differences between the effects of caffeine in abstainers and caffeine users. Caffeine abstainers reacted negatively to caffeine, with the principal complaint of nervousness. Users complained of sleepiness and dysphoria after the placebo and reacted positively to caffeine, reporting increased alertness and decreased irritability. (Goldstein, A., Kaizer, S., and Whitby, O.: *Psychotropic Effects of Caffeine in Man. IV. Quantitative and Qualitative Differences Associated with Habituation to Coffee*, *Clin. Pharmacol. Ther.* 10: 469 (July) 1969.)
